# Supplementary material for: Unraveling the mystery: effect of trapped air on platelet adhesion on hydrophobic nanostructured titanium dioxide
Source: Royal Society of Chemistry journal article supplement (doi:10.1039/d4bm01143k), 2025-01-01
Supplement: d4bm01143k1.pdf [file d4bm01143k1.pdf]

*Electronic Supplementary Information*

**Unraveling the mystery: effect of trapped air on platelet adhesion on hydrophobic nanostructured titanium dioxide**

Zhenyu Shen,<sup>‡a,b</sup> Ke Wu,<sup>‡c</sup> Zhiwei Chen,<sup>a,b</sup> Yun Yang<sup>\*a,b</sup> and Qiaoling Huang<sup>\*a,b</sup>

<sup>a</sup> Research Institute for Biomimetics and Soft Matter, Fujian Provincial Key Laboratory for Soft Functional Materials Research, Department of Physics, College of Physical Science and Technology, Xiamen University, Xiamen 361005, China.

<sup>b</sup> Jiujiang Research Institute of Xiamen University, Jiujiang 332000, China

<sup>c</sup> Department of Cardiology, The 909th Hospital, School of Medicine, Xiamen University, Zhangzhou 363000, China

\* E-mail: yangyun@xmu.edu.cn (Y. Yang); qlhuang@xmu.edu.cn (Q. Huang)

‡ These authors contributed equally to this work.

## Supplementary Table

**Table S1**

Characterization of superhydrophobic samples with different nanostructures.

| Nanostructure             | sNPA            | NPA              | NTA             | NVS             |
|---------------------------|-----------------|------------------|-----------------|-----------------|
| Anodization potential (V) | 3               | 5                | 20              | 30              |
| Diameter (nm)             | ~20             | ~30              | ~100            | -               |
| Thickness (nm)            | ~90             | ~100             | ~300            | ~350            |
| Contact angle (deg)       | $150.2 \pm 0.9$ | $152.2 \pm 0.8$  | $153.4 \pm 1.0$ | $155.3 \pm 1.2$ |
| Adhesive force            | $176.9 \pm 2.8$ | $136.8 \pm 14.3$ | $49.0 \pm 13.0$ | $5.25 \pm 1.6$  |
| Air Fraction              | -               | 80.0%            | 81.7%           | 84.1%           |

## Supplementary Figures

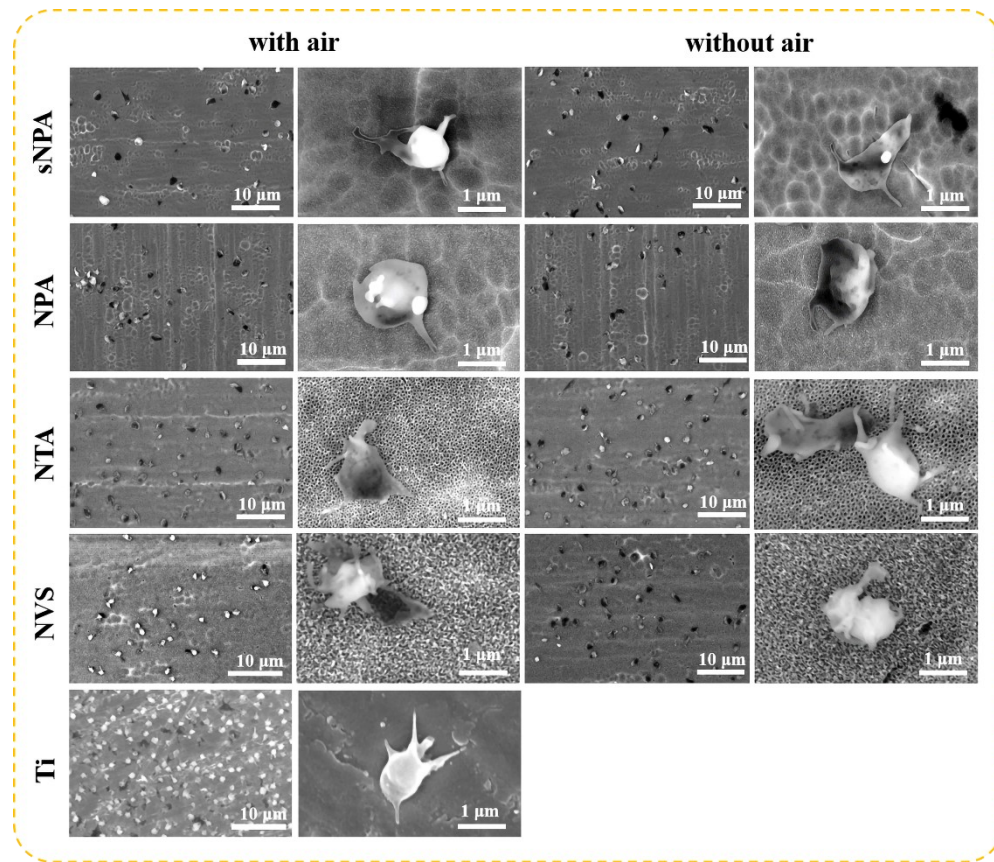

Fig. S1 SEM images of adherent platelets on different samples.

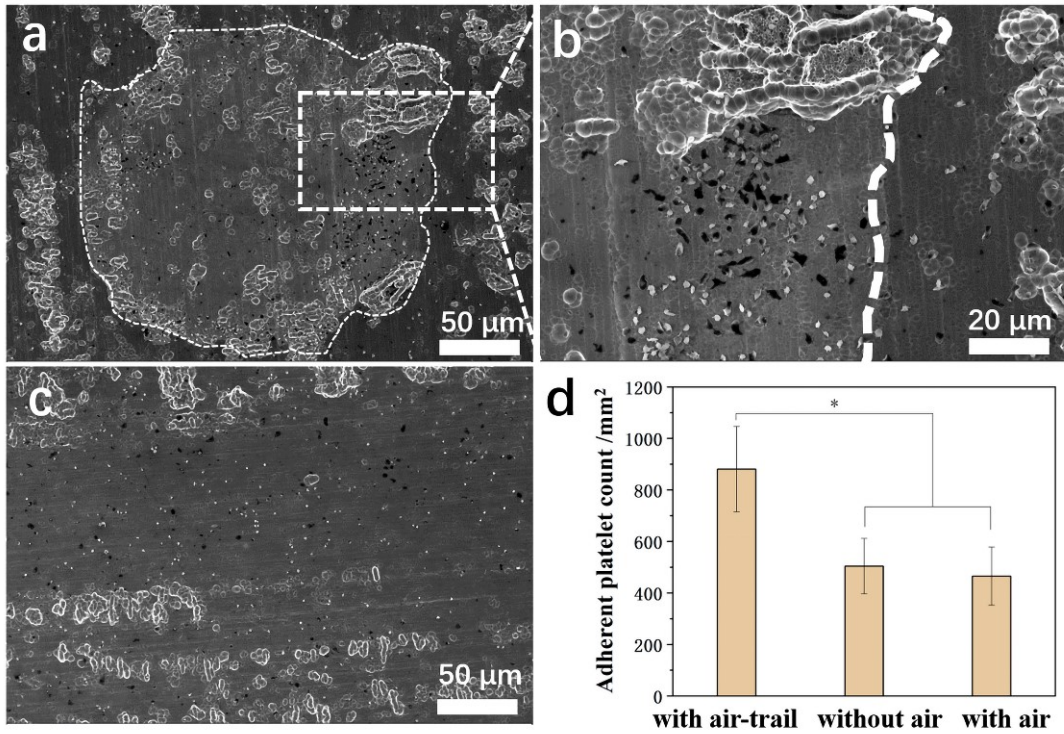

**Fig. S2** SEM images of platelet adhesion on superhydrophobic NTA with trapped air. (a, b) Special trace area and (c) normal platelet adhesion area. (d) A comparison of adherent platelet numbers in different areas.
